# Supplementary material for: The polygenic architecture of left ventricular mass mirrors the clinical epidemiology
Source: PubMed Central journal article supplement (PMC7200691; doi:10.1038/s41598-020-64525-z), 2020-05-05
Supplement: 41598_2020_64525_MOESM1_ESM.pdf [file 41598_2020_64525_MOESM1_ESM.pdf]

# **The polygenic architecture of left ventricular mass mirrors the clinical epidemiology**

## **Supplementary Materials**

Jonathan D. Mosley, Rebecca T. Levinson, Eric Farber-Eger, Todd L. Edwards, Jacklyn N. Hellwege, Adriana M. Hung, Ayush Giri, Megan M. Shuey, Christian M. Shaffer, Mingjian Shi, Evan L. Brittain, Wendy K. Chung, Iftikhar J. Kullo, Adelaide M. Arruda-Olson, Gail P. Jarvik, Eric B. Larson, David R. Crosslin, Marc S. Williams, Ken M. Borthwick, Hakon Hakonarson, Joshua C. Denny, Thomas J. Wang, Charles M. Stein, Dan M. Roden and Quinn S. Wells

# Supplementary figure 1

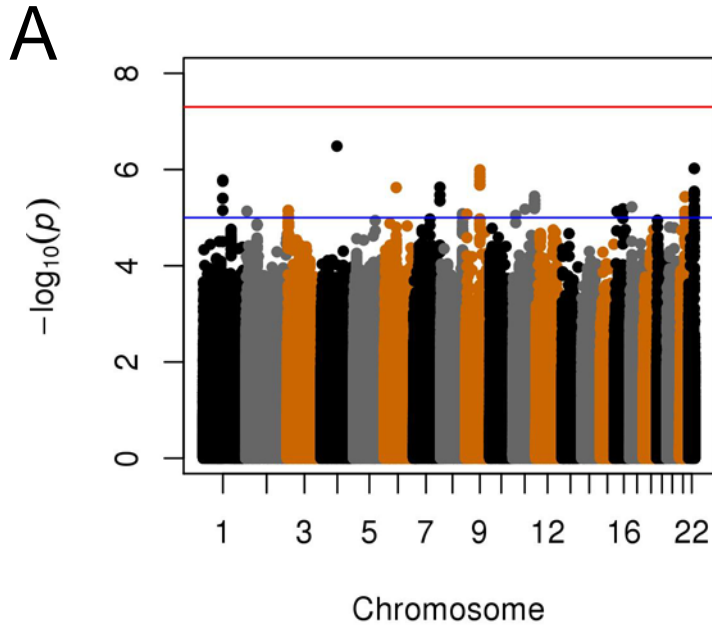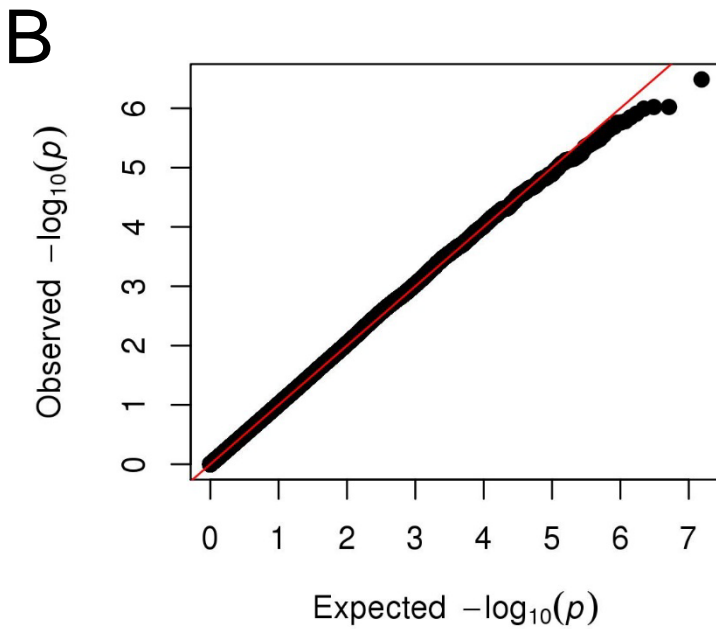

**Supplementary Figure 1: Results of a GWAS analysis of LV mass.** Results are based on an additive model adjusted for age, sex and 10 PCs. The figures show the (A) Manhattan plot and (B) the QQ plot..

**Supplementary Table 1.** Characteristics of the BioVU subjects with TTE measurements. Shown are the 100 most prevalent PheWAS diagnoses.

| Characteristic                   |               |
|----------------------------------|---------------|
| Males [n (%)]                    | 4,025 (53.0%) |
| Females [n (%)]                  | 3,576 (47.0%) |
|                                  |               |
| Age at echo (years) [mean (s.d)] | 64 (12)       |

**Most common prevalent diagnoses:**

| Diagnosis                                               | All Subjects |            | Males |            | Female |            |
|---------------------------------------------------------|--------------|------------|-------|------------|--------|------------|
|                                                         | Count        | Prevalence | Count | Prevalence | Count  | Prevalence |
| Hypertension                                            | 6121         | 80.5%      | 3347  | 83.2%      | 2774   | 77.6%      |
| Essential hypertension                                  | 6018         | 79.2%      | 3281  | 81.5%      | 2737   | 76.5%      |
| Other symptoms of respiratory system                    | 5702         | 75.0%      | 3037  | 75.5%      | 2665   | 74.5%      |
| Cardiac dysrhythmias                                    | 5171         | 68.0%      | 2893  | 71.9%      | 2278   | 63.7%      |
| Disorders of lipid metabolism                           | 5123         | 67.4%      | 2885  | 71.7%      | 2238   | 62.6%      |
| Hyperlipidemia                                          | 5114         | 67.3%      | 2880  | 71.6%      | 2234   | 62.5%      |
| Nonspecific chest pain                                  | 4647         | 61.1%      | 2466  | 61.3%      | 2181   | 61.0%      |
| Shortness of breath                                     | 4413         | 58.1%      | 2361  | 58.7%      | 2052   | 57.4%      |
| Ischemic Heart Disease                                  | 4359         | 57.3%      | 2684  | 66.7%      | 1675   | 46.8%      |
| Fluid, electrolyte, & acid-base balance disorders       | 3965         | 52.2%      | 2156  | 53.6%      | 1809   | 50.6%      |
| Coronary atherosclerosis                                | 3929         | 51.7%      | 2501  | 62.1%      | 1428   | 39.9%      |
| Malaise and fatigue                                     | 3818         | 50.2%      | 1879  | 46.7%      | 1939   | 54.2%      |
| Other anemias                                           | 3686         | 48.5%      | 2005  | 49.8%      | 1681   | 47.0%      |
| Pulmonary collapse; interstitial/compensatory emphysema | 3659         | 48.1%      | 2148  | 53.4%      | 1511   | 42.3%      |
| Other dyspnea                                           | 3422         | 45.0%      | 1865  | 46.3%      | 1557   | 43.5%      |
| Electrolyte imbalance                                   | 3263         | 42.9%      | 1775  | 44.1%      | 1488   | 41.6%      |
| Congestive heart failure, nonhypertensive               | 3205         | 42.2%      | 1853  | 46.0%      | 1352   | 37.8%      |
| Diseases of esophagus                                   | 3164         | 41.6%      | 1602  | 39.8%      | 1562   | 43.7%      |
| Pain in joint                                           | 3011         | 39.6%      | 1371  | 34.1%      | 1640   | 45.9%      |
| Heart valve disorders                                   | 2976         | 39.2%      | 1678  | 41.7%      | 1298   | 36.3%      |
| Cardiomegaly                                            | 2926         | 38.5%      | 1776  | 44.1%      | 1150   | 32.2%      |
| Esophagitis, GERD & related diseases                    | 2865         | 37.7%      | 1436  | 35.7%      | 1429   | 40.0%      |
| Abdominal pain                                          | 2748         | 36.2%      | 1336  | 33.2%      | 1412   | 39.5%      |
| GERD                                                    | 2724         | 35.8%      | 1340  | 33.3%      | 1384   | 38.7%      |
| Diabetes mellitus                                       | 2720         | 35.8%      | 1605  | 39.9%      | 1115   | 31.2%      |
| Renal failure                                           | 2718         | 35.8%      | 1658  | 41.2%      | 1060   | 29.6%      |
| Tobacco use disorder                                    | 2701         | 35.5%      | 1686  | 41.9%      | 1015   | 28.4%      |
| Pleurisy                                                | 2700         | 35.5%      | 1556  | 38.7%      | 1144   | 32.0%      |
| Congestive heart failure NOS                            | 2684         | 35.3%      | 1552  | 38.6%      | 1132   | 31.7%      |
| Atrial fibrillation & flutter                           | 2678         | 35.2%      | 1643  | 40.8%      | 1035   | 28.9%      |
| Hypertensive heart and/or renal disease                 | 2654         | 34.9%      | 1544  | 38.4%      | 1110   | 31.0%      |
| Cardiac conduction disorders                            | 2645         | 34.8%      | 1610  | 40.0%      | 1035   | 28.9%      |
| Type 2 diabetes                                         | 2641         | 34.7%      | 1560  | 38.8%      | 1081   | 30.2%      |
| Atrial fibrillation                                     | 2614         | 34.4%      | 1602  | 39.8%      | 1012   | 28.3%      |
| Cerebrovascular disease                                 | 2564         | 33.7%      | 1394  | 34.6%      | 1170   | 32.7%      |
| Mixed hyperlipidemia                                    | 2528         | 33.3%      | 1450  | 36.0%      | 1078   | 30.1%      |
| Cough                                                   | 2442         | 32.1%      | 1209  | 30.0%      | 1233   | 34.5%      |
| Hypotension                                             | 2398         | 31.5%      | 1417  | 35.2%      | 981    | 27.4%      |
| Respiratory failure; insufficiency; arrest              | 2354         | 31.0%      | 1334  | 33.1%      | 1020   | 28.5%      |

|                                                               |      |       |      |       |      |       |
|---------------------------------------------------------------|------|-------|------|-------|------|-------|
| Back pain                                                     | 2331 | 30.7% | 1070 | 26.6% | 1261 | 35.3% |
| Osteoarthritis                                                | 2321 | 30.5% | 1061 | 26.4% | 1260 | 35.2% |
| Edema                                                         | 2225 | 29.3% | 1086 | 27.0% | 1139 | 31.9% |
| Mood disorders                                                | 2164 | 28.5% | 967  | 24.0% | 1197 | 33.5% |
| Symptoms/disorders of the urinary system                      | 2152 | 28.3% | 1033 | 25.7% | 1119 | 31.3% |
| Other forms of chronic heart disease                          | 2106 | 27.7% | 1287 | 32.0% | 819  | 22.9% |
| Other diseases of lung                                        | 2104 | 27.7% | 1165 | 28.9% | 939  | 26.3% |
| Overweight                                                    | 2094 | 27.5% | 1058 | 26.3% | 1036 | 29.0% |
| Acute renal failure                                           | 2092 | 27.5% | 1270 | 31.6% | 822  | 23.0% |
| Tachycardia NOS                                               | 2084 | 27.4% | 1116 | 27.7% | 968  | 27.1% |
| Nausea and vomiting                                           | 2072 | 27.3% | 930  | 23.1% | 1142 | 31.9% |
| Urinary tract infection                                       | 2056 | 27.0% | 748  | 18.6% | 1308 | 36.6% |
| Hypopotassemia                                                | 2051 | 27.0% | 1046 | 26.0% | 1005 | 28.1% |
| Chronic ischemic heart disease                                | 2049 | 27.0% | 1435 | 35.7% | 614  | 17.2% |
| Nonrheumatic mitral valve disorders                           | 2037 | 26.8% | 1117 | 27.8% | 920  | 25.7% |
| Osteoporosis, osteopenia, & pathological fractures            | 2018 | 26.5% | 693  | 17.2% | 1325 | 37.1% |
| Hypotension NOS                                               | 2008 | 26.4% | 1200 | 29.8% | 808  | 22.6% |
| Hypovolemia                                                   | 2005 | 26.4% | 1100 | 27.3% | 905  | 25.3% |
| Abnormal glucose                                              | 1999 | 26.3% | 1147 | 28.5% | 852  | 23.8% |
| Depression                                                    | 1990 | 26.2% | 870  | 21.6% | 1120 | 31.3% |
| pulmonary heart disease                                       | 1978 | 26.0% | 1119 | 27.8% | 859  | 24.0% |
| Palpitations                                                  | 1950 | 25.7% | 879  | 21.8% | 1071 | 29.9% |
| Long-term use of anticoagulants                               | 1937 | 25.5% | 1137 | 28.2% | 800  | 22.4% |
| Fever of unknown origin                                       | 1937 | 25.5% | 1078 | 26.8% | 859  | 24.0% |
| Myocardial infarction                                         | 1927 | 25.4% | 1287 | 32.0% | 640  | 17.9% |
| Cardiac arrhythmia NOS                                        | 1913 | 25.2% | 1142 | 28.4% | 771  | 21.6% |
| Neurological disorders                                        | 1912 | 25.2% | 1029 | 25.6% | 883  | 24.7% |
| Hypercholesterolemia                                          | 1843 | 24.2% | 990  | 24.6% | 853  | 23.9% |
| Other abnormal glucose                                        | 1842 | 24.2% | 1072 | 26.6% | 770  | 21.5% |
| Pneumonia                                                     | 1842 | 24.2% | 1013 | 25.2% | 829  | 23.2% |
| Chronic airway obstruction                                    | 1826 | 24.0% | 992  | 24.6% | 834  | 23.3% |
| Hypertensive heart disease                                    | 1809 | 23.8% | 1006 | 25.0% | 803  | 22.5% |
| Obesity                                                       | 1799 | 23.7% | 922  | 22.9% | 877  | 24.5% |
| Acute posthemorrhagic anemia                                  | 1780 | 23.4% | 1032 | 25.6% | 748  | 20.9% |
| Disorders of the kidney & ureters                             | 1772 | 23.3% | 1087 | 27.0% | 685  | 19.2% |
| Anxiety, phobic & dissociative disorders                      | 1753 | 23.1% | 720  | 17.9% | 1033 | 28.9% |
| Other specified cardiac dysrhythmias                          | 1736 | 22.8% | 1009 | 25.1% | 727  | 20.3% |
| Chronic renal failure                                         | 1729 | 22.7% | 1087 | 27.0% | 642  | 18.0% |
| Hypothyroidism                                                | 1717 | 22.6% | 654  | 16.2% | 1063 | 29.7% |
| Osteoarthritis NOS                                            | 1711 | 22.5% | 781  | 19.4% | 930  | 26.0% |
| Ill-defined descriptions and complications of heart disease   | 1708 | 22.5% | 972  | 24.1% | 736  | 20.6% |
| Occlusion and stenosis of precerebral arteries                | 1661 | 21.9% | 957  | 23.8% | 704  | 19.7% |
| Diseases of white blood cells                                 | 1651 | 21.7% | 902  | 22.4% | 749  | 20.9% |
| Atherosclerosis                                               | 1642 | 21.6% | 956  | 23.8% | 686  | 19.2% |
| Hypothyroidism NOS                                            | 1630 | 21.4% | 614  | 15.3% | 1016 | 28.4% |
| Nonrheumatic aortic valve disorders                           | 1606 | 21.1% | 942  | 23.4% | 664  | 18.6% |
| Cardiomyopathy                                                | 1593 | 21.0% | 1049 | 26.1% | 544  | 15.2% |
| Encounter for long-term use of anticoagulants/antithrombotics | 1587 | 20.9% | 974  | 24.2% | 613  | 17.1% |
| Light-headedness and vertigo                                  | 1585 | 20.9% | 744  | 18.5% | 841  | 23.5% |
| Systolic or combined heart failure                            | 1584 | 20.8% | 1018 | 25.3% | 566  | 15.8% |
| Syncope and collapse                                          | 1558 | 20.5% | 846  | 21.0% | 712  | 19.9% |
| Respiratory failure                                           | 1537 | 20.2% | 835  | 20.7% | 702  | 19.6% |
| Anxiety disorder                                              | 1532 | 20.2% | 619  | 15.4% | 913  | 25.5% |
| Primary pulmonary hypertension                                | 1532 | 20.2% | 843  | 20.9% | 689  | 19.3% |

|                                               |      |       |     |       |     |       |
|-----------------------------------------------|------|-------|-----|-------|-----|-------|
| Sleep disorders                               | 1530 | 20.1% | 719 | 17.9% | 811 | 22.7% |
| Diverticulosis and diverticulitis             | 1516 | 19.9% | 832 | 20.7% | 684 | 19.1% |
| Chronic rheumatic disease of the heart valves | 1501 | 19.7% | 801 | 19.9% | 700 | 19.6% |
| Diverticulosis                                | 1452 | 19.1% | 811 | 20.1% | 641 | 17.9% |
| Encounter for long-term use of aspirin        | 1440 | 18.9% | 890 | 22.1% | 550 | 15.4% |
| Symptoms and disorders of the joints          | 1434 | 18.9% | 662 | 16.4% | 772 | 21.6% |
| Primary/intrinsic cardiomyopathies            | 1426 | 18.8% | 944 | 23.5% | 482 | 13.5% |

**Supplementary Table 2.** Characteristics of the eMERGE and additional BioVU subjects. Shown are the 100 most common PheWAS diagnoses.

**eMERGE subjects**

| Characteristic           |                  |
|--------------------------|------------------|
| Males [n (%)]            | 14,268 (44.9%)   |
| Females [n (%)]          | 17,503 (55.1%)   |
| Age at echo [mean (s.d)] | 1945 (1935-1955) |

**BioVU subjects (excluding TTE subjects)**

| Characteristic           |                |
|--------------------------|----------------|
| Males [n (%)]            | 12,011 (44.4%) |
| Females [n (%)]          | 15,054 (55.6%) |
| Age at echo [mean (s.d)] | 51.0 (20.2)    |

**Most Common diagnoses**

| Diagnosis                                | Count | Prevalence |
|------------------------------------------|-------|------------|
| Hypertension                             | 19753 | 62.2%      |
| Disorders of lipid metabolism            | 19751 | 62.2%      |
| Hyperlipidemia                           | 19668 | 61.9%      |
| Essential hypertension                   | 19433 | 61.2%      |
| Other symptoms of respiratory system     | 18083 | 56.9%      |
| Pain in joint                            | 17994 | 56.6%      |
| Cardiac dysrhythmias                     | 14636 | 46.1%      |
| Nonspecific chest pain                   | 14382 | 45.3%      |
| Osteoarthritis                           | 13963 | 43.9%      |
| Back pain                                | 13598 | 42.8%      |
| Abdominal pain                           | 13330 | 42.0%      |
| Malaise and fatigue                      | 12643 | 39.8%      |
| Cough                                    | 11941 | 37.6%      |
| Diseases of esophagus                    | 11801 | 37.1%      |
| Hypercholesterolemia                     | 11652 | 36.7%      |
| Osteoarthritis NOS                       | 11603 | 36.5%      |
| Peripheral enthesopathies                | 11555 | 36.4%      |
| Esophagitis, GERD & related diseases     | 11334 | 35.7%      |
| Ischemic Heart Disease                   | 11104 | 34.9%      |
| Symptoms/disorders of the urinary system | 10936 | 34.4%      |

**Most Common diagnoses**

| Diagnosis                                         | Count | Prevalence |
|---------------------------------------------------|-------|------------|
| Hypertension                                      | 13185 | 48.7%      |
| Essential hypertension                            | 12958 | 47.9%      |
| Other symptoms of respiratory system              | 12838 | 47.4%      |
| Malaise and fatigue                               | 11085 | 41.0%      |
| Pain in joint                                     | 10365 | 38.3%      |
| Disorders of lipid metabolism                     | 10305 | 38.1%      |
| Hyperlipidemia                                    | 10264 | 37.9%      |
| Nonspecific chest pain                            | 10122 | 37.4%      |
| Abdominal pain                                    | 9856  | 36.4%      |
| Cardiac dysrhythmias                              | 9548  | 35.3%      |
| Diseases of esophagus                             | 8392  | 31.0%      |
| Fluid, electrolyte, & acid-base balance disorders | 8354  | 30.9%      |
| Esophagitis, GERD & related diseases              | 7843  | 29.0%      |
| Other anemias                                     | 7801  | 28.8%      |
| Shortness of breath                               | 7674  | 28.4%      |
| Back pain                                         | 7354  | 27.2%      |
| GERD                                              | 7249  | 26.8%      |
| Cough                                             | 6967  | 25.7%      |
| Ischemic Heart Disease                            | 6723  | 24.8%      |
| Symptoms/disorders of the urinary system          | 6314  | 23.3%      |

|                                                    |       |       |
|----------------------------------------------------|-------|-------|
| Degenerative skin conditions and other dermatoses  | 10877 | 34.2% |
| Overweight                                         | 10783 | 33.9% |
| Other anemias                                      | 10772 | 33.9% |
| Acute upper respiratory infections                 | 10763 | 33.9% |
| Other dyspnea                                      | 10637 | 33.5% |
| GERD                                               | 10357 | 32.6% |
| Cataract                                           | 10066 | 31.7% |
| Osteoporosis, osteopenia, & pathological fractures | 10007 | 31.5% |
| Coronary atherosclerosis                           | 9640  | 30.3% |
| Disorders of refraction and accommodation          | 9595  | 30.2% |
| Fluid, electrolyte, & acid-base balance disorders  | 9400  | 29.6% |
| Atopic or contact dermatitis                       | 9211  | 29.0% |
| Shortness of breath                                | 9152  | 28.8% |
| Urinary tract infection                            | 8802  | 27.7% |
| Seborrheic keratosis                               | 8729  | 27.5% |
| Obesity                                            | 8697  | 27.4% |
| Cardiac conduction disorders                       | 8664  | 27.3% |
| Benign neoplasm of skin                            | 8590  | 27.0% |
| Light-headedness and vertigo                       | 8443  | 26.6% |
| Senile cataract                                    | 8355  | 26.3% |
| Mood disorders                                     | 8275  | 26.0% |
| Anxiety, phobic & dissociative disorders           | 8104  | 25.5% |
| Disorder of skin and subcutaneous tissue NOS       | 7961  | 25.1% |
| Benign neoplasm of colon                           | 7942  | 25.0% |
| Depression                                         | 7920  | 24.9% |
| Diabetes mellitus                                  | 7787  | 24.5% |
| Spondylosis and allied disorders                   | 7714  | 24.3% |
| Intervertebral disc disorders                      | 7685  | 24.2% |
| Hearing loss                                       | 7675  | 24.2% |
| Type 2 diabetes                                    | 7627  | 24.0% |

|                                                         |      |       |
|---------------------------------------------------------|------|-------|
| Nausea and vomiting                                     | 6314 | 23.3% |
| Mood disorders                                          | 6064 | 22.4% |
| Electrolyte imbalance                                   | 6049 | 22.3% |
| Osteoarthritis                                          | 5979 | 22.1% |
| Coronary atherosclerosis                                | 5932 | 21.9% |
| Other dyspnea                                           | 5876 | 21.7% |
| Urinary tract infection                                 | 5764 | 21.3% |
| Pulmonary collapse; interstitial/compensatory emphysema | 5688 | 21.0% |
| Tobacco use disorder                                    | 5638 | 20.8% |
| Fever of unknown origin                                 | 5543 | 20.5% |
| Depression                                              | 5506 | 20.3% |
| Acute upper respiratory infections                      | 5416 | 20.0% |
| Overweight                                              | 5368 | 19.8% |
| Anxiety, phobic & dissociative disorders                | 5330 | 19.7% |
| Diabetes mellitus                                       | 5250 | 19.4% |
| Mixed hyperlipidemia                                    | 5168 | 19.1% |
| Other headache syndromes                                | 5051 | 18.7% |
| Osteoporosis, osteopenia, & pathological fractures      | 5040 | 18.6% |
| Type 2 diabetes                                         | 5001 | 18.5% |
| Hypovolemia                                             | 4646 | 17.2% |
| Hypercholesterolemia                                    | 4475 | 16.5% |
| Allergic rhinitis                                       | 4467 | 16.5% |
| Anxiety disorder                                        | 4464 | 16.5% |
| Edema                                                   | 4337 | 16.0% |
| Hypertensive heart and/or renal disease                 | 4329 | 16.0% |
| Renal failure                                           | 4295 | 15.9% |
| Peripheral enthesopathies                               | 4218 | 15.6% |
| Hypothyroidism                                          | 4206 | 15.5% |
| Cerebrovascular disease                                 | 4200 | 15.5% |
| Obesity                                                 | 4199 | 15.5% |

|                                                    |      |       |
|----------------------------------------------------|------|-------|
| Symptoms and disorders of the joints               | 7605 | 23.9% |
| Other headache syndromes                           | 7567 | 23.8% |
| Diverticulosis and diverticulitis                  | 7499 | 23.6% |
| Osteoarthritis; localized                          | 7480 | 23.5% |
| Spondylosis without myelopathy                     | 7463 | 23.5% |
| Superficial cellulitis & abscess                   | 7447 | 23.4% |
| Other hypertrophic and atrophic conditions of skin | 7407 | 23.3% |
| Sleep disorders                                    | 7328 | 23.1% |
| Osteopenia                                         | 7321 | 23.0% |
| Cerebrovascular disease                            | 7309 | 23.0% |
| Heart valve disorders                              | 7276 | 22.9% |
| Sprains and strains                                | 7224 | 22.7% |
| Electrolyte imbalance                              | 7179 | 22.6% |
| Disorders of synovium, tendon, and bursa           | 7172 | 22.6% |
| Edema                                              | 7120 | 22.4% |
| Actinic keratosis                                  | 7100 | 22.3% |
| Diverticulosis                                     | 7093 | 22.3% |
| Diseases of sebaceous glands                       | 7073 | 22.3% |
| Renal failure                                      | 7069 | 22.2% |
| Enthesopathy                                       | 7052 | 22.2% |
| Hemorrhoids                                        | 7023 | 22.1% |
| Menopausal & postmenopausal disorders              | 6935 | 21.8% |
| Cervicalgia                                        | 6902 | 21.7% |
| Abdominal hernia                                   | 6881 | 21.7% |
| Nausea and vomiting                                | 6698 | 21.1% |
| Anxiety disorder                                   | 6669 | 21.0% |
| Contusion                                          | 6534 | 20.6% |
| Hypothyroidism                                     | 6340 | 20.0% |
| Abnormal glucose                                   | 6292 | 19.8% |
| Abnormal findings on mammogram or breast exam      | 6273 | 19.7% |
| Tobacco use disorder                               | 6271 | 19.7% |
| Hypothyroidism NOS                                 | 6141 | 19.3% |
| Other specified cardiac dysrhythmias               | 6141 | 19.3% |

|                                                   |      |       |
|---------------------------------------------------|------|-------|
| Osteoarthritis NOS                                | 4177 | 15.4% |
| Sleep disorders                                   | 4047 | 15.0% |
| Vitamin deficiency                                | 3969 | 14.7% |
| Symptoms and disorders of the joints              | 3944 | 14.6% |
| Tachycardia NOS                                   | 3924 | 14.5% |
| Hypopotassemia                                    | 3913 | 14.5% |
| Hypothyroidism NOS                                | 3893 | 14.4% |
| Pleurisy                                          | 3861 | 14.3% |
| Congestive heart failure, nonhypertensive         | 3842 | 14.2% |
| Pneumonia                                         | 3788 | 14.0% |
| Neurological disorders                            | 3779 | 14.0% |
| Light-headedness and vertigo                      | 3718 | 13.7% |
| Other diseases of lung                            | 3712 | 13.7% |
| Superficial cellulitis & abscess                  | 3707 | 13.7% |
| Palpitations                                      | 3696 | 13.7% |
| Cardiac conduction disorders                      | 3663 | 13.5% |
| Cervicalgia                                       | 3613 | 13.3% |
| Acute sinusitis                                   | 3583 | 13.2% |
| Rash and other nonspecific skin eruption          | 3551 | 13.1% |
| Hypotension                                       | 3541 | 13.1% |
| Intervertebral disc disorders                     | 3530 | 13.0% |
| Degenerative skin conditions and other dermatoses | 3500 | 12.9% |
| Benign neoplasm of colon                          | 3483 | 12.9% |
| Abdominal hernia                                  | 3450 | 12.7% |
| Heart valve disorders                             | 3449 | 12.7% |
| Diverticulosis and diverticulitis                 | 3445 | 12.7% |
| Disorders of the kidney & ureters                 | 3428 | 12.7% |
| Atrial fibrillation & flutter                     | 3387 | 12.5% |
| Vitamin D deficiency                              | 3360 | 12.4% |
| Respiratory failure; insufficiency; arrest        | 3312 | 12.2% |
| Diseases of white blood cells                     | 3305 | 12.2% |
| Diverticulosis                                    | 3294 | 12.2% |
| Atrial fibrillation                               | 3289 | 12.2% |



|                                                             |      |       |
|-------------------------------------------------------------|------|-------|
| Other peripheral nerve disorders                            | 6127 | 19.3% |
| Degeneration of intervertebral disc                         | 6116 | 19.2% |
| Gastrointestinal hemorrhage                                 | 6107 | 19.2% |
| Pneumonia                                                   | 6077 | 19.1% |
| Disturbance of skin sensation                               | 6077 | 19.1% |
| Cardiac arrhythmia NOS                                      | 5961 | 18.8% |
| Ill-defined descriptions and complications of heart disease | 5950 | 18.7% |
| Other abnormal blood chemistry                              | 5882 | 18.5% |
| Dermatophytosis / Dermatomycosis                            | 5870 | 18.5% |
| Fever of unknown origin                                     | 5865 | 18.5% |
| Atrial fibrillation & flutter                               | 5853 | 18.4% |
| Allergic rhinitis                                           | 5849 | 18.4% |
| Congestive heart failure, nonhypertens                      | 5841 | 18.4% |
| Astigmatism                                                 | 5784 | 18.2% |
| Atrial fibrillation                                         | 5708 | 18.0% |
| Frequency of urination and polyuria                         | 5706 | 18.0% |
| Abnormal movement                                           | 5687 | 17.9% |

|                                             |      |       |
|---------------------------------------------|------|-------|
| Gastrointestinal hemorrhage                 | 3287 | 12.1% |
| Hearing loss                                | 3258 | 12.0% |
| Acute pain                                  | 3240 | 12.0% |
| Cardiomegaly                                | 3202 | 11.8% |
| Dysphagia                                   | 3173 | 11.7% |
| Abnormal glucose                            | 3138 | 11.6% |
| Other symptoms involving abdomen and pelvis | 3137 | 11.6% |
| Chronic airway obstruction                  | 3134 | 11.6% |
| Skin neoplasm of uncertain behavior         | 3126 | 11.5% |
| Hypertensive heart disease                  | 3106 | 11.5% |
| Osteoarthritis; localized                   | 3095 | 11.4% |
| Disturbance of skin sensation               | 3092 | 11.4% |
| Congestive heart failure NOS                | 3027 | 11.2% |
| Spondylosis and allied disorders            | 3023 | 11.2% |
| Other disorders of intestine                | 3009 | 11.1% |
| Menopausal & postmenopausal disorders       | 3007 | 11.1% |
| Osteoporosis, NOS or other                  | 3001 | 11.1% |

**Supplementary Table 3: PheWAS phenotypes associated LV mass at FDR  $q < 0.1$ .**

| PheCode | Phenotype                                        | Cases | Controls | Odds-ratio | 95% CI      | p-value | FDR p-value |
|---------|--------------------------------------------------|-------|----------|------------|-------------|---------|-------------|
| 278     | Overweight                                       | 10282 | 37475    | 1.08       | (1.05-1.11) | 3.5E-08 | 2.5E-05     |
| 278.1   | Obesity                                          | 8250  | 36493    | 1.09       | (1.05-1.12) | 5.6E-08 | 2.5E-05     |
| 278.11  | Morbid obesity                                   | 3548  | 36319    | 1.10       | (1.06-1.15) | 7.9E-06 | 2.0E-03     |
| 401.1   | Essential hypertension                           | 22662 | 20492    | 1.06       | (1.03-1.09) | 1.0E-05 | 2.0E-03     |
| 425.1   | Primary/intrinsic cardiomyopathies               | 2231  | 46830    | 1.13       | (1.07-1.19) | 1.2E-05 | 2.0E-03     |
| 401     | Hypertension                                     | 24010 | 20492    | 1.06       | (1.03-1.08) | 1.6E-05 | 2.0E-03     |
| 411.4   | Coronary atherosclerosis                         | 11882 | 29867    | 1.06       | (1.03-1.09) | 2.0E-05 | 2.0E-03     |
| 411     | Ischemic Heart Disease                           | 13796 | 32202    | 1.06       | (1.03-1.09) | 2.1E-05 | 2.0E-03     |
| 425     | Cardiomyopathy                                   | 2569  | 46841    | 1.11       | (1.06-1.17) | 2.3E-05 | 2.0E-03     |
| 428.1   | Congestive heart failure NOS                     | 5085  | 37458    | 1.09       | (1.05-1.13) | 2.3E-05 | 2.0E-03     |
| 428     | Congestive heart failure, nonhypertensive        | 6682  | 37458    | 1.08       | (1.04-1.11) | 2.5E-05 | 2.0E-03     |
| 411.2   | Myocardial infarction                            | 4632  | 31854    | 1.09       | (1.04-1.13) | 5.5E-05 | 4.1E-03     |
| 586     | Disorders of the kidney & ureters                | 4448  | 37758    | 1.08       | (1.04-1.12) | 7.3E-05 | 4.9E-03     |
| 250.2   | Type 2 diabetes                                  | 9040  | 33956    | 1.06       | (1.03-1.09) | 7.6E-05 | 4.9E-03     |
| 250.3   | Insulin pump user                                | 1324  | 35092    | 1.14       | (1.07-1.22) | 9.8E-05 | 5.9E-03     |
| 428.3   | Systolic or combined heart failure               | 2013  | 37458    | 1.12       | (1.06-1.18) | 1.1E-04 | 6.0E-03     |
| 585.1   | Acute renal failure                              | 3577  | 37758    | 1.09       | (1.04-1.13) | 1.4E-04 | 6.6E-03     |
| 415     | pulmonary heart disease                          | 3324  | 42094    | 1.09       | (1.04-1.14) | 1.4E-04 | 6.6E-03     |
| 586.2   | Cyst of kidney, acquired                         | 996   | 36665    | 1.16       | (1.07-1.25) | 1.4E-04 | 6.6E-03     |
| 250     | Diabetes mellitus                                | 9384  | 33956    | 1.06       | (1.03-1.09) | 1.6E-04 | 7.2E-03     |
| 416     | Cardiomegaly                                     | 3710  | 40939    | 1.08       | (1.04-1.13) | 1.8E-04 | 7.7E-03     |
| 286.2   | Long-term use of anticoagulants                  | 4440  | 39127    | 1.08       | (1.03-1.12) | 3.0E-04 | 0.01        |
| 427.22  | Atrial flutter                                   | 1395  | 25110    | 1.13       | (1.06-1.21) | 3.6E-04 | 0.01        |
| 427.2   | Atrial fibrillation & flutter                    | 6393  | 24628    | 1.07       | (1.03-1.11) | 4.3E-04 | 0.02        |
| 585.32  | End stage renal disease                          | 1168  | 37754    | 1.14       | (1.06-1.22) | 4.8E-04 | 0.02        |
| 411.1   | Unstable angina (intermediate coronary syndrome) | 2145  | 29301    | 1.10       | (1.04-1.16) | 7.9E-04 | 0.03        |
| 411.8   | Chronic ischemic heart disease                   | 3826  | 29859    | 1.08       | (1.03-1.12) | 1.3E-03 | 0.04        |
| 426     | Cardiac conduction disorders                     | 6840  | 26928    | 1.06       | (1.02-1.10) | 1.4E-03 | 0.04        |

|        |                                                   |       |       |      |             |         |      |
|--------|---------------------------------------------------|-------|-------|------|-------------|---------|------|
| 427.21 | Atrial fibrillation                               | 5771  | 24292 | 1.06 | (1.02-1.11) | 1.4E-03 | 0.04 |
| 585.3  | Chronic renal failure                             | 5881  | 37767 | 1.06 | (1.02-1.10) | 1.7E-03 | 0.05 |
| 585    | Renal failure                                     | 8339  | 37767 | 1.05 | (1.02-1.08) | 1.8E-03 | 0.05 |
| 428.2  | Heart failure NOS                                 | 1694  | 37458 | 1.10 | (1.04-1.17) | 2.1E-03 | 0.06 |
| 427.4  | Cardiac arrest & ventricular fibrillation         | 488   | 26918 | 1.19 | (1.06-1.33) | 2.2E-03 | 0.06 |
| 426.9  | Cardiac pacemaker/device in situ                  | 2394  | 26928 | 1.09 | (1.03-1.15) | 2.2E-03 | 0.06 |
| 272    | Disorders of lipid metabolism                     | 22026 | 22638 | 1.04 | (1.01-1.06) | 2.7E-03 | 0.07 |
| 272.1  | Hyperlipidemia                                    | 21741 | 22638 | 1.04 | (1.01-1.06) | 2.7E-03 | 0.07 |
| 426.2  | AV block                                          | 1672  | 25310 | 1.11 | (1.04-1.18) | 2.8E-03 | 0.07 |
| 426.32 | Left bundle branch block                          | 882   | 24282 | 1.14 | (1.05-1.24) | 2.9E-03 | 0.07 |
| 585.34 | Chronic Kidney Disease, Stage IV                  | 1063  | 37767 | 1.12 | (1.04-1.21) | 2.9E-03 | 0.07 |
| 250.1  | Type 1 diabetes                                   | 1793  | 35092 | 1.09 | (1.03-1.16) | 3.4E-03 | 0.07 |
| 327.32 | Obstructive sleep apnea                           | 3170  | 36287 | 1.07 | (1.02-1.12) | 3.4E-03 | 0.07 |
| 285.21 | Anemia in chronic kidney disease                  | 831   | 33345 | 1.13 | (1.04-1.23) | 3.5E-03 | 0.08 |
| 415.2  | Primary pulmonary hypertension                    | 2199  | 40926 | 1.08 | (1.03-1.14) | 3.7E-03 | 0.08 |
| 426.3  | Bundle branch block                               | 1714  | 26918 | 1.10 | (1.03-1.18) | 3.7E-03 | 0.08 |
| 401.22 | Hypertensive chronic kidney disease               | 2832  | 21532 | 1.08 | (1.02-1.14) | 4.0E-03 | 0.08 |
| 276    | Fluid, electrolyte, & acid-base balance disorders | 10865 | 36334 | 1.04 | (1.01-1.07) | 4.3E-03 | 0.08 |
| 426.91 | Cardiac pacemaker in situ                         | 1753  | 26928 | 1.10 | (1.03-1.17) | 4.4E-03 | 0.08 |
| 335    | Multiple sclerosis                                | 1082  | 39411 | 1.11 | (1.03-1.19) | 4.6E-03 | 0.09 |
| 250.22 | Type 2 diabetic nephropathy                       | 1403  | 31651 | 1.10 | (1.03-1.17) | 4.8E-03 | 0.09 |
| 433    | Cerebrovascular disease                           | 7646  | 40246 | 1.05 | (1.01-1.08) | 5.0E-03 | 0.09 |
| 252    | Disorders of parathyroid gland                    | 970   | 44476 | 1.12 | (1.03-1.21) | 5.1E-03 | 0.09 |
| 426.7  | Abnormal electrocardiogram                        | 2300  | 26915 | 1.09 | (1.03-1.15) | 5.5E-03 | 0.09 |

**Supplementary Table 4:** Validating the genetic risk scores.

| <b>GRS</b>                    | <b>Validation Phenotype</b> | <b>Beta (se)</b> | <b>p-value</b>        |
|-------------------------------|-----------------------------|------------------|-----------------------|
| Body mass index (BMI)         | BMI                         | 0.24 (0.01)      | $1 \times 10^{-100}$  |
| Coronary artery disease (CAD) | CAD                         | 0.115 (0.011)    | $7.8 \times 10^{-24}$ |
| Type 2 diabetes (T2D)         | T2D                         | 0.205 (0.012)    | $8.7 \times 10^{-63}$ |
| Systolic blood pressure (SBP) | SBP                         | 0.079 (0.011)    | $5.5 \times 10^{-13}$ |

## **Million Veteran Program: Consortium Acknowledgement for Manuscripts**

### **MVP Executive Committee**

- Co-Chair: J. Michael Gaziano, M.D., M.P.H.
- Co-Chair: Rachel Ramoni, D.M.D., Sc.D.
- Jim Breeling, M.D. (ex-officio)
- Kyong-Mi Chang, M.D.
- Grant Huang, Ph.D.
- Sumitra Muralidhar, Ph.D.
- Christopher J. O'Donnell, M.D., M.P.H.
- Philip S. Tsao, Ph.D.

### **MVP Program Office**

- Sumitra Muralidhar, Ph.D.
- Jennifer Moser, Ph.D.

### **MVP Recruitment/Enrollment**

- Recruitment/Enrollment Director/Deputy Director, Boston – Stacey B. Whitbourne, Ph.D.; Jessica V. Brewer, M.P.H.
- MVP Coordinating Centers
  - o Clinical Epidemiology Research Center (CERC), West Haven – John Concato, M.D., M.P.H.
  - o Cooperative Studies Program Clinical Research Pharmacy Coordinating Center, Albuquerque - Stuart Warren, J.D., Pharm D.; Dean P. Argyres, M.S.
  - o Genomics Coordinating Center, Palo Alto – Philip S. Tsao, Ph.D.
  - o Massachusetts Veterans Epidemiology Research Information Center (MAVERIC), Boston - J. Michael Gaziano, M.D., M.P.H.
  - o MVP Information Center, Canandaigua – Brady Stephens, M.S.
- Core Biorepository, Boston – Mary T. Brophy M.D., M.P.H.; Donald E. Humphries, Ph.D.
- MVP Informatics, Boston – Nhan Do, M.D.; Shahpoor Shayan
- Data Operations/Analytics, Boston – Xuan-Mai T. Nguyen, Ph.D.

### **MVP Science**

- Genomics - Christopher J. O'Donnell, M.D., M.P.H.; Saiju Pyarajan Ph.D.; Philip S. Tsao, Ph.D.
- Phenomics - Kelly Cho, M.P.H, Ph.D.
- Data and Computational Sciences – Saiju Pyarajan, Ph.D.
- Statistical Genetics – Elizabeth Hauser, Ph.D.; Yan Sun, Ph.D.; Hongyu Zhao, Ph.D.

## **MVP Local Site Investigators**

- Atlanta VA Medical Center (Peter Wilson)
- Bay Pines VA Healthcare System (Rachel McArdle)
- Birmingham VA Medical Center (Louis Dellitalia)
- Cincinnati VA Medical Center (John Harley)
- Clement J. Zablocki VA Medical Center (Jeffrey Whittle)
- Durham VA Medical Center (Jean Beckham)
- Edith Nourse Rogers Memorial Veterans Hospital (John Wells)
- Edward Hines, Jr. VA Medical Center (Salvador Gutierrez)
- Fayetteville VA Medical Center (Gretchen Gibson)
- VA Health Care Upstate New York (Laurence Kaminsky)
- New Mexico VA Health Care System (Gerardo Villareal)
- VA Boston Healthcare System (Scott Kinlay)
- VA Western New York Healthcare System (Junzhe Xu)
- Ralph H. Johnson VA Medical Center (Mark Hamner)
- Wm. Jennings Bryan Dorn VA Medical Center (Kathlyn Sue Haddock)
- VA North Texas Health Care System (Sujata Bhushan)
- Hampton VA Medical Center (Pran Iruvanti)
- Hunter Holmes McGuire VA Medical Center (Michael Godschalk)
- Iowa City VA Health Care System (Zuhair Ballas)
- Jack C. Montgomery VA Medical Center (Malcolm Buford)
- James A. Haley Veterans' Hospital (Stephen Mastorides)
- Louisville VA Medical Center (Jon Klein)
- Manchester VA Medical Center (Nora Ratcliffe)
- Miami VA Health Care System (Hermes Florez)
- Michael E. DeBakey VA Medical Center (Alan Swann)
- Minneapolis VA Health Care System (Maureen Murdoch)
- N. FL/S. GA Veterans Health System (Peruvemba Sriram)
- Northport VA Medical Center (Shing Shing Yeh)
- Overton Brooks VA Medical Center (Ronald Washburn)
- Philadelphia VA Medical Center (Darshana Jhala)
- Phoenix VA Health Care System (Samuel Aguayo)
- Portland VA Medical Center (David Cohen)
- Providence VA Medical Center (Satish Sharma)
- Richard Roudebush VA Medical Center (John Callaghan)
- Salem VA Medical Center (Kris Ann Oursler)
- San Francisco VA Health Care System (Mary Whooley)
- South Texas Veterans Health Care System (Sunil Ahuja)
- Southeast Louisiana Veterans Health Care System (Amparo Gutierrez)

- Southern Arizona VA Health Care System (Ronald Schifman)
- Sioux Falls VA Health Care System (Jennifer Greco)
- St. Louis VA Health Care System (Michael Rauchman)
- Syracuse VA Medical Center (Richard Servatius)
- VA Eastern Kansas Health Care System (Mary Oehlert)
- VA Greater Los Angeles Health Care System (Agnes Wallbom)
- VA Loma Linda Healthcare System (Ronald Fernando)
- VA Long Beach Healthcare System (Timothy Morgan)
- VA Maine Healthcare System (Todd Stapley)
- VA New York Harbor Healthcare System (Scott Sherman)
- VA Pacific Islands Health Care System (Gwenevere Anderson)
- VA Palo Alto Health Care System (Philip Tsao)
- VA Pittsburgh Health Care System (Elif Sonel)
- VA Puget Sound Health Care System (Edward Boyko)
- VA Salt Lake City Health Care System (Laurence Meyer)
- VA San Diego Healthcare System (Samir Gupta)
- VA Southern Nevada Healthcare System (Joseph Fayad)
- VA Tennessee Valley Healthcare System (Adriana Hung)
- Washington DC VA Medical Center (Jack Lichy)
- W.G. (Bill) Hefner VA Medical Center (Robin Hurley)
- White River Junction VA Medical Center (Brooks Robey)
- William S. Middleton Memorial Veterans Hospital (Robert Striker)
